# Supplementary material for: Comprehensive Profiling and Therapeutic Insights into Differentially Expressed Genes in Hepatocellular Carcinoma
Source: MDPI journal article supplement (doi:10.3390/cancers15235653), 2023-11-30
Supplement: s1 [file s1]

Comprehensive Profiling and Therapeutic Insights into Differentially Expressed Genes in Hepatocellular Carcinoma

SUPPLEMENTARY MATERIAL

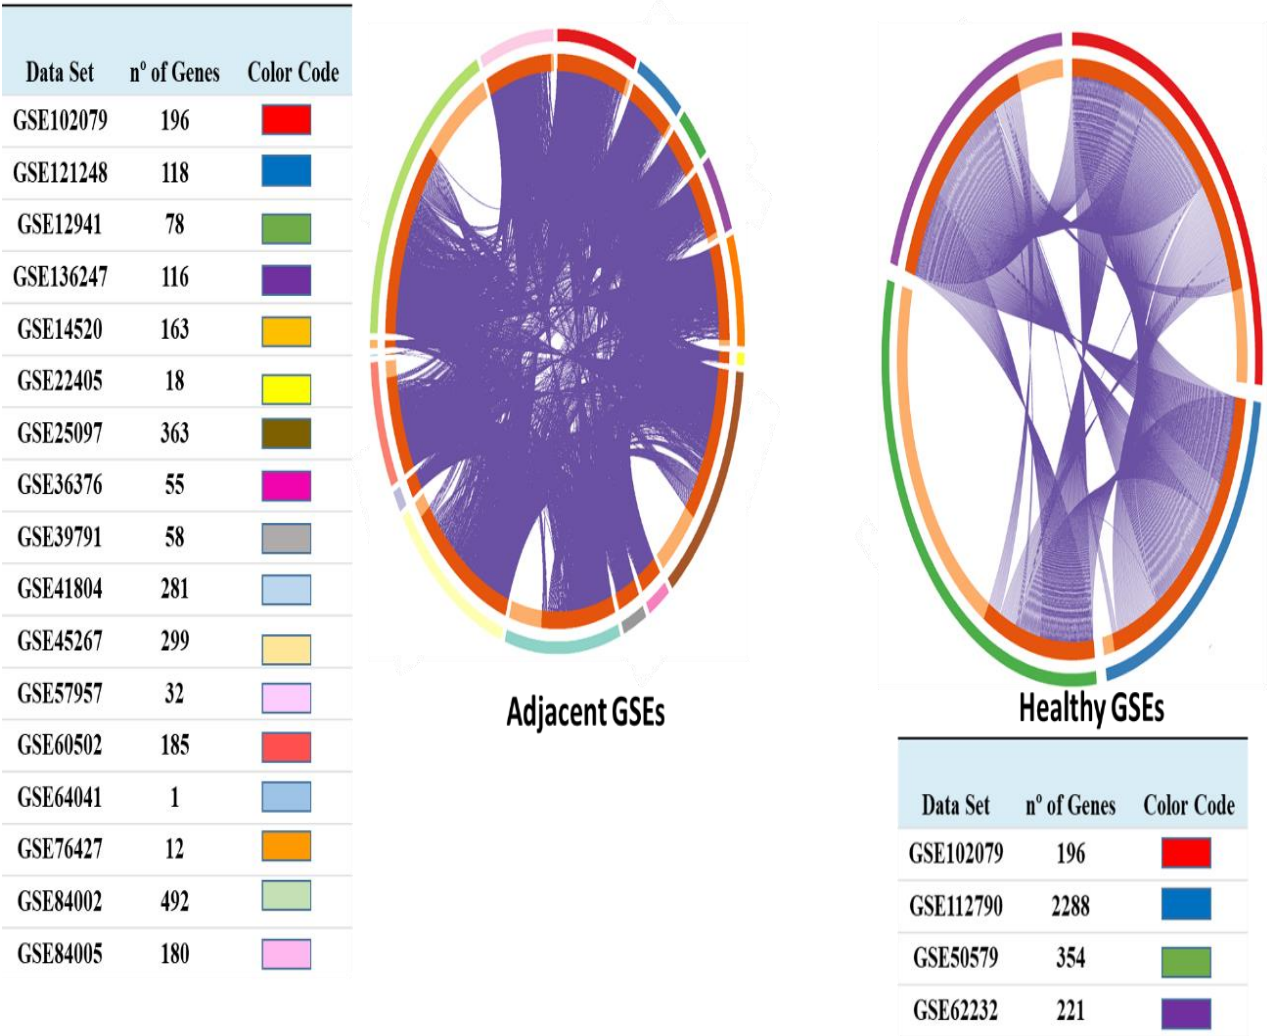

**Figure S1.** Circos-plot showing the number and distribution of genes by GSE. Figure adopted from the web tool MetaScape.

A

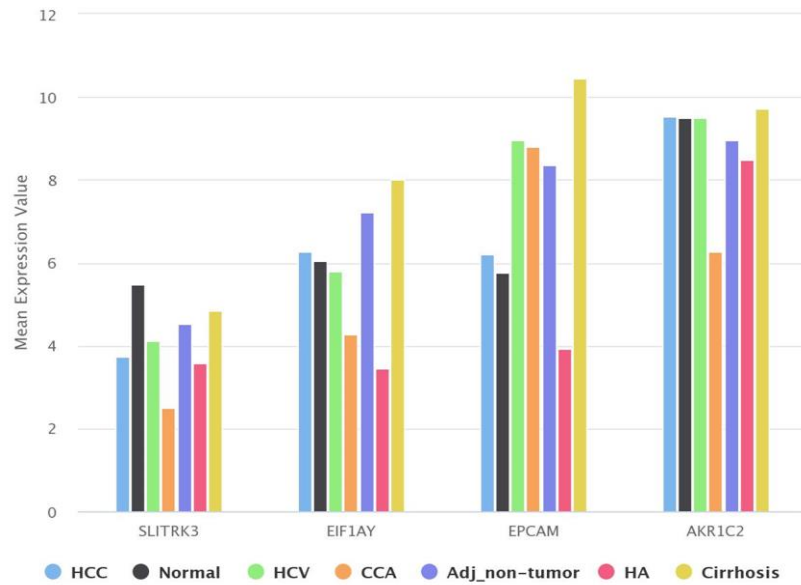

B

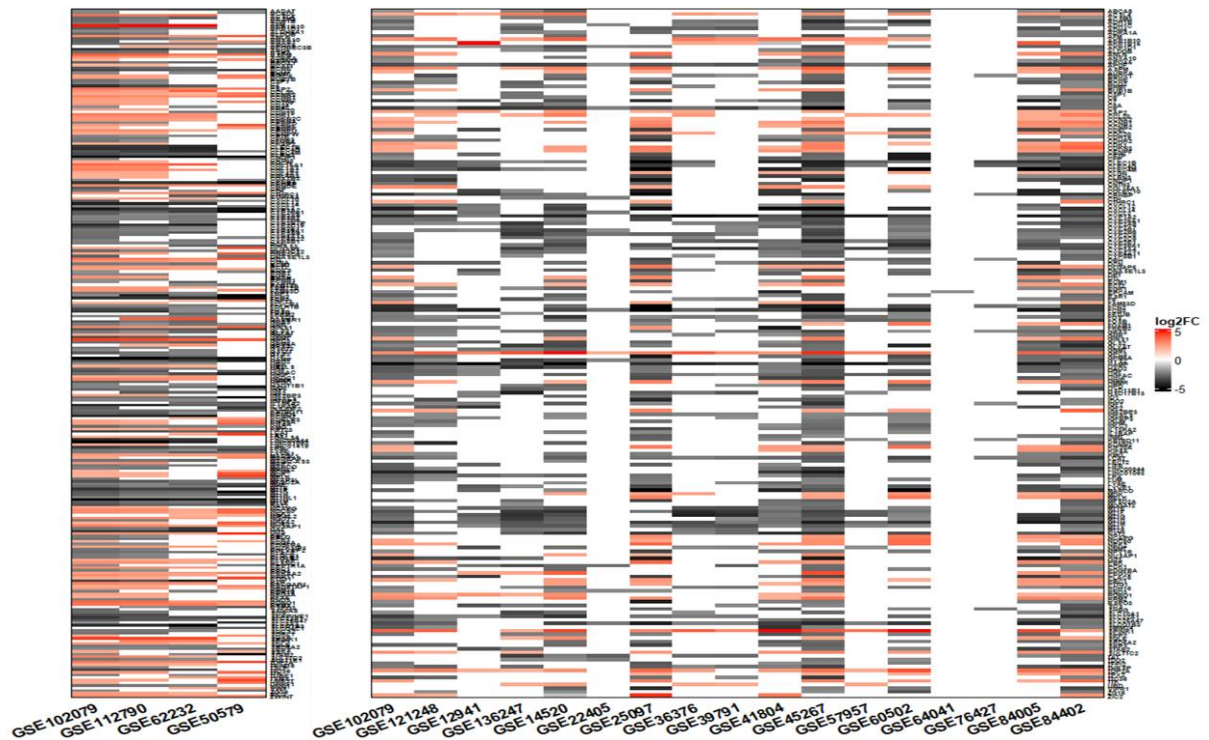

**Figure S2. A)** Difference in the mean expression between Normal and Adjacent non-tumor tissue (data extracted from cancerlivER database, available at <https://webs.iitd.edu.in/raghava/cancerliver/index.html>); HCC: Hepatocellular carcinoma; CCA: Cholangiocarcinoma; HA: Hepatic Adenoma. **B)** Heat-maps with log<sub>2</sub>FC from Normal versus tumor tissue, and Adjacent-non tumor versus tumor tissue.

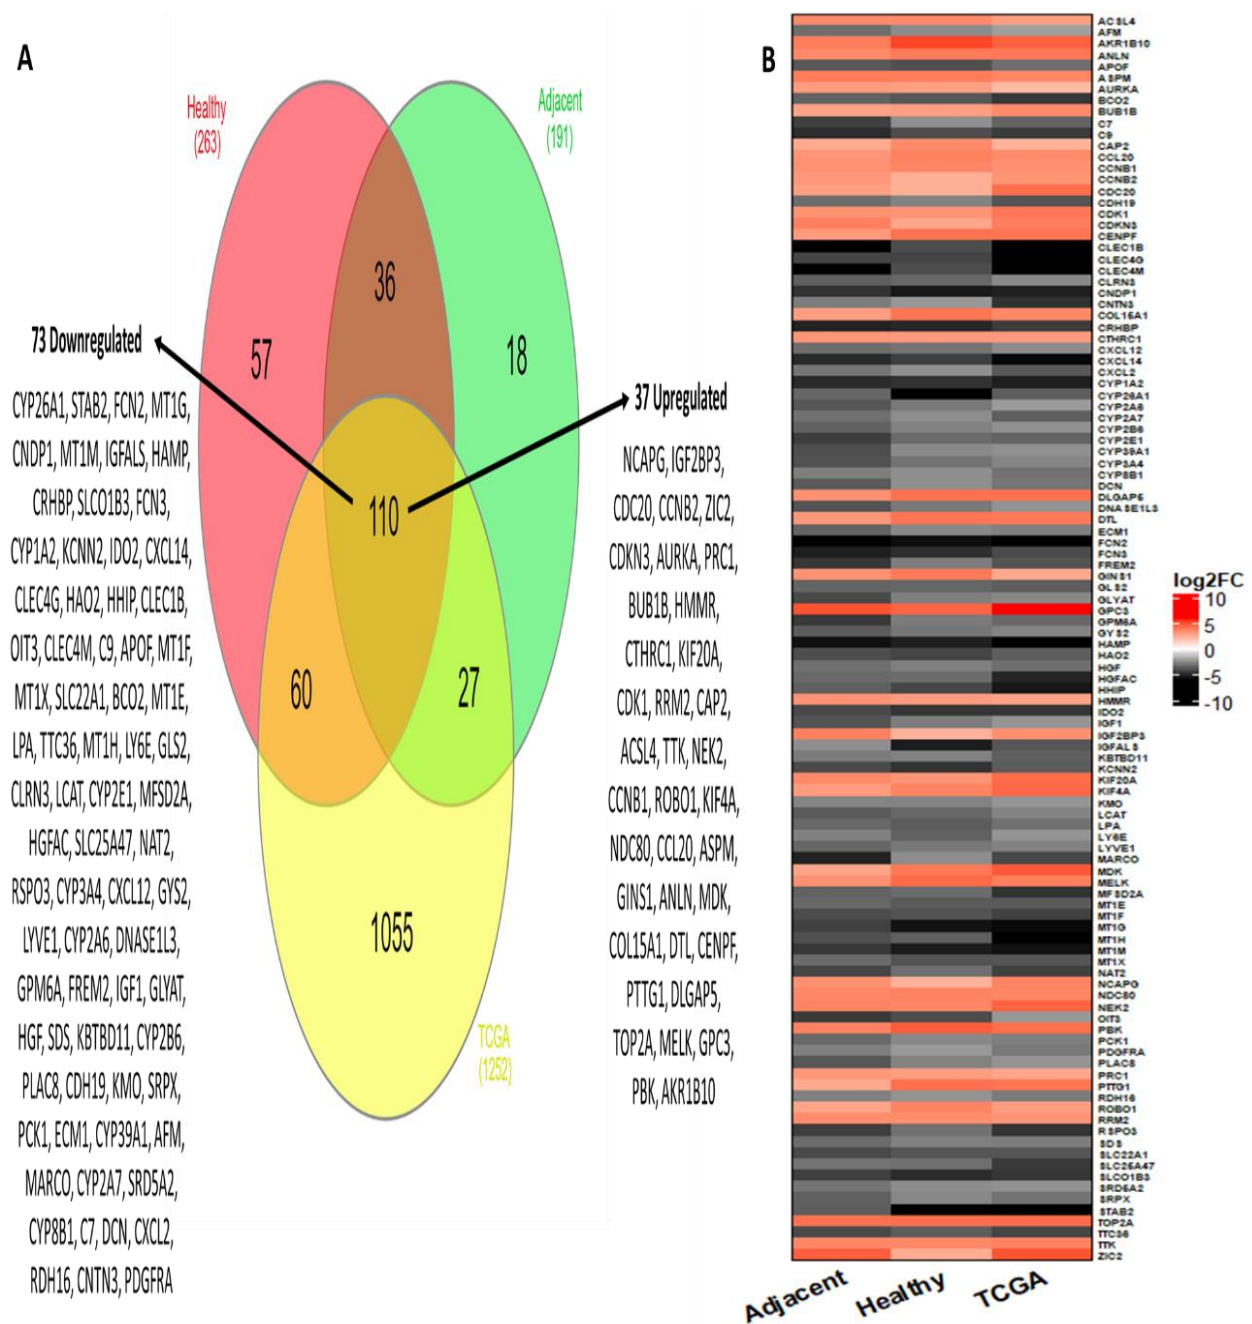

**Figure S3.** DEGs and their differential expression profile: **A)** Venn diagram showing DEGs shared between Healthy, Adjacent and TCGA groups; **B)** Heat-maps of the 110 DEGs with log<sub>2</sub>FC.

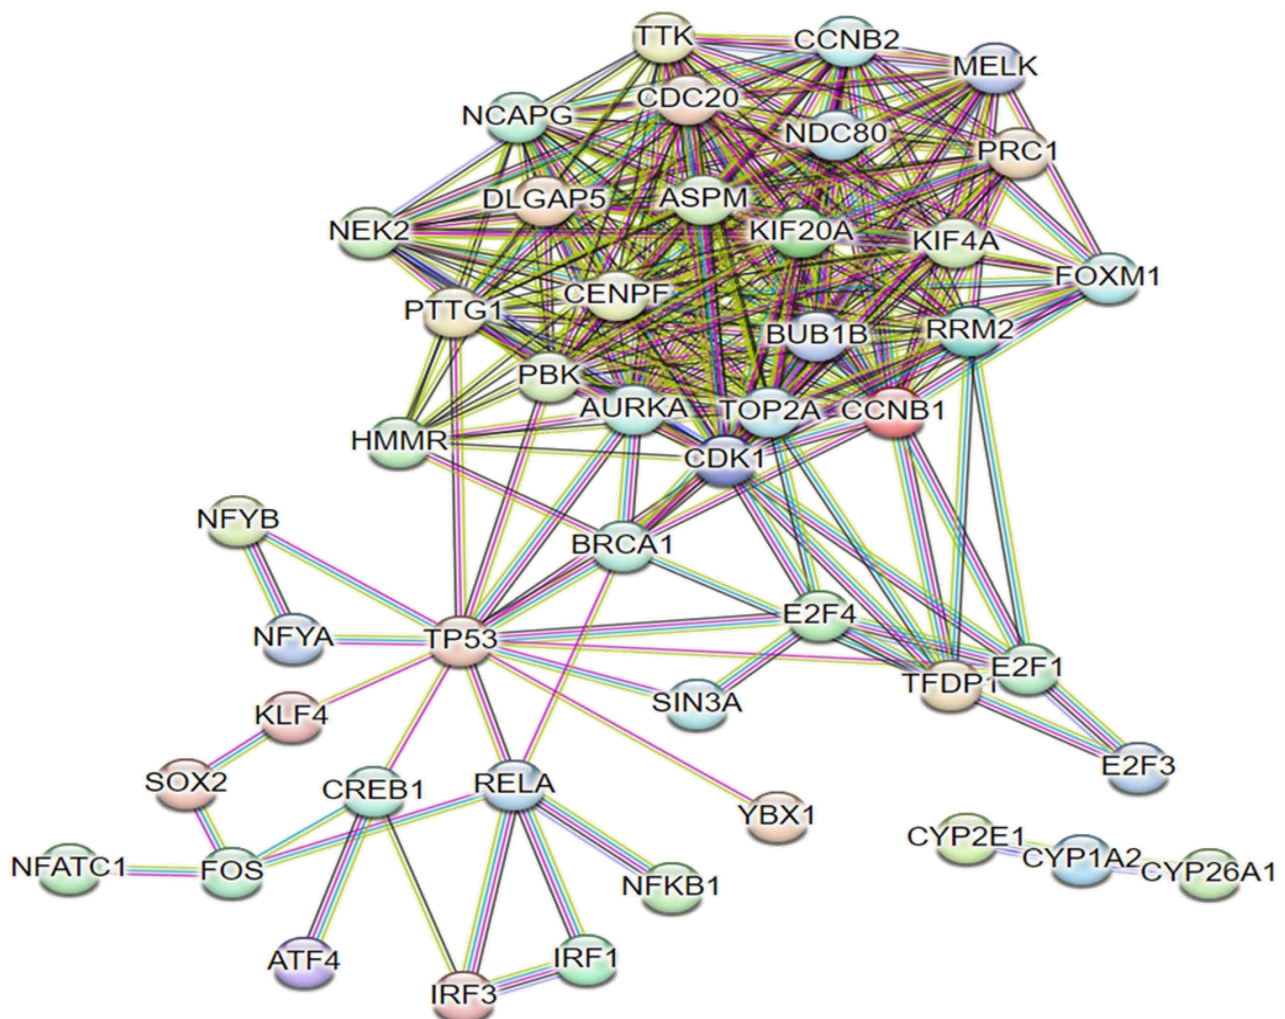

|                                         |                                     |
|-----------------------------------------|-------------------------------------|
| number of nodes: 52                     | expected number of edges: 18        |
| number of edges: 223                    | PPI enrichment p-value: $< 1.0e-16$ |
| average node degree: 8.58               |                                     |
| avg. local clustering coefficient: 0.64 |                                     |

**Figure S4.** PPI network for HCC signature with minimum required interaction score 0.9 (highest confidence). Nodes with no connection are not show. Data obtained and adapted from STRING database.



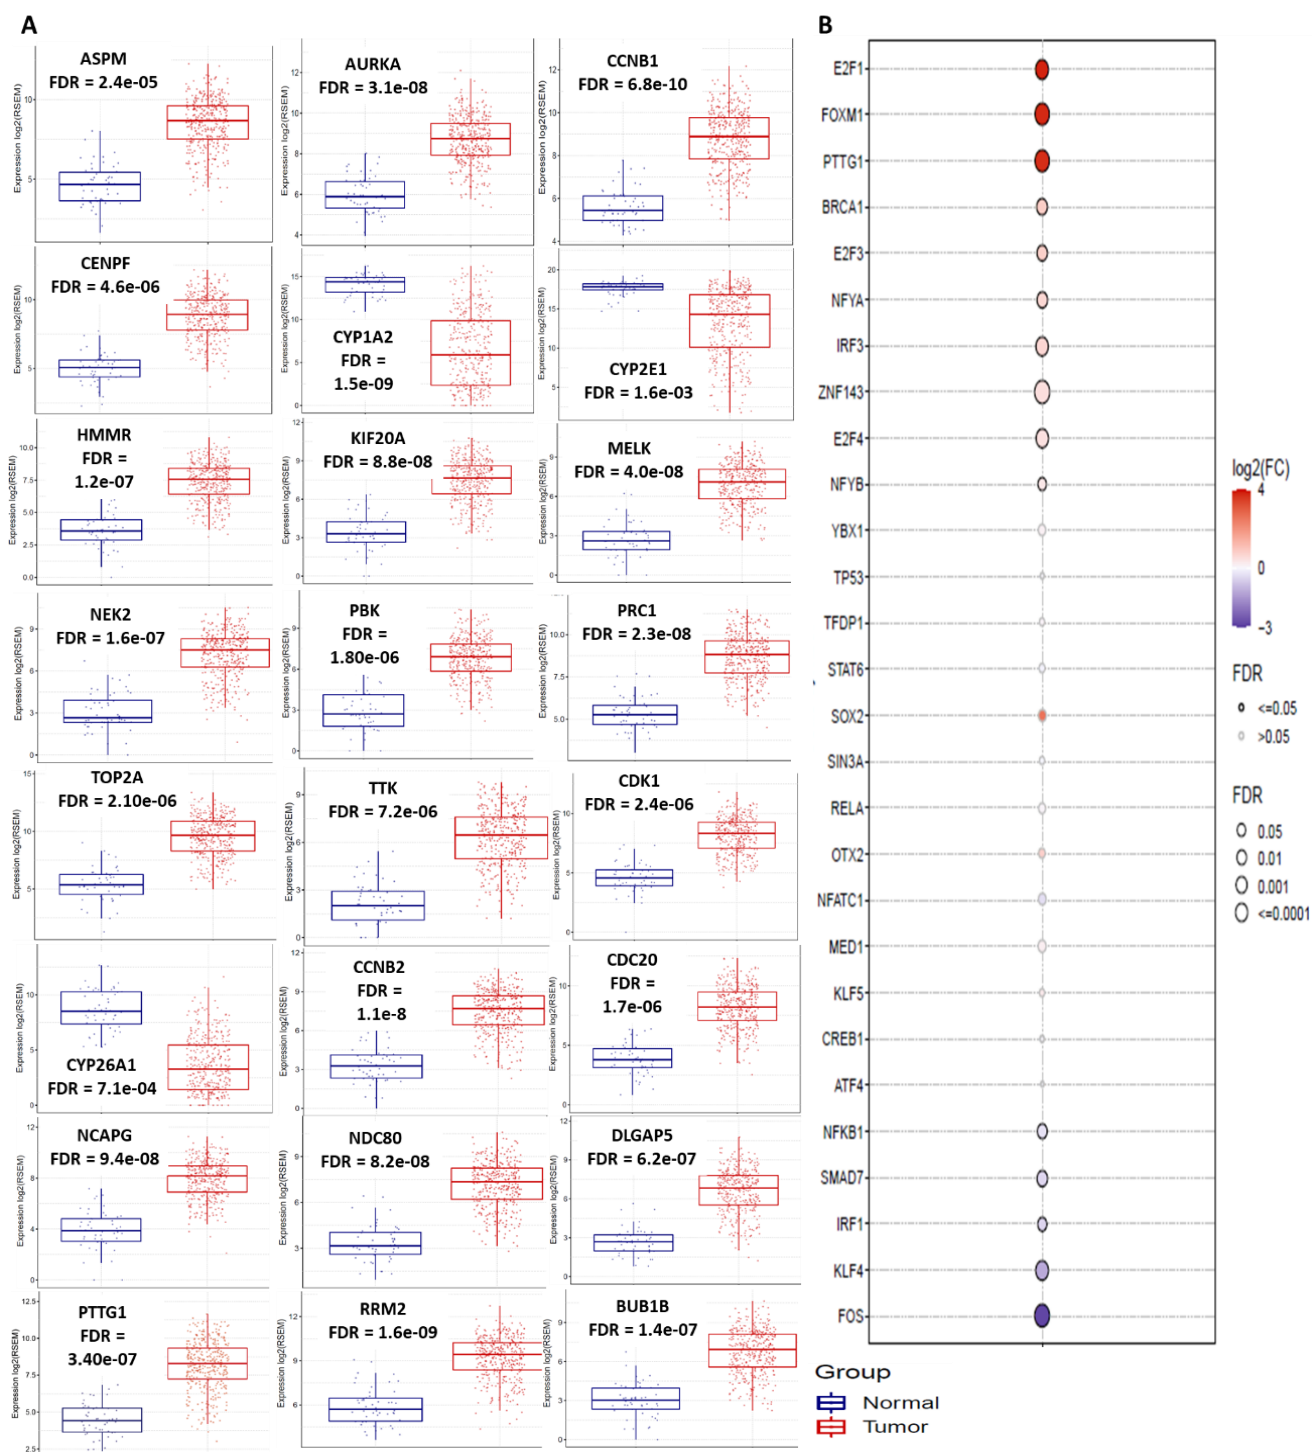

**Figure S5.** Differential Expression of **A)** Hub genes and **B)** Transcription factors. Data are based on normalized and batch corrected RSEM mRNA expression. Retrieved and adapted from <sup>1</sup>

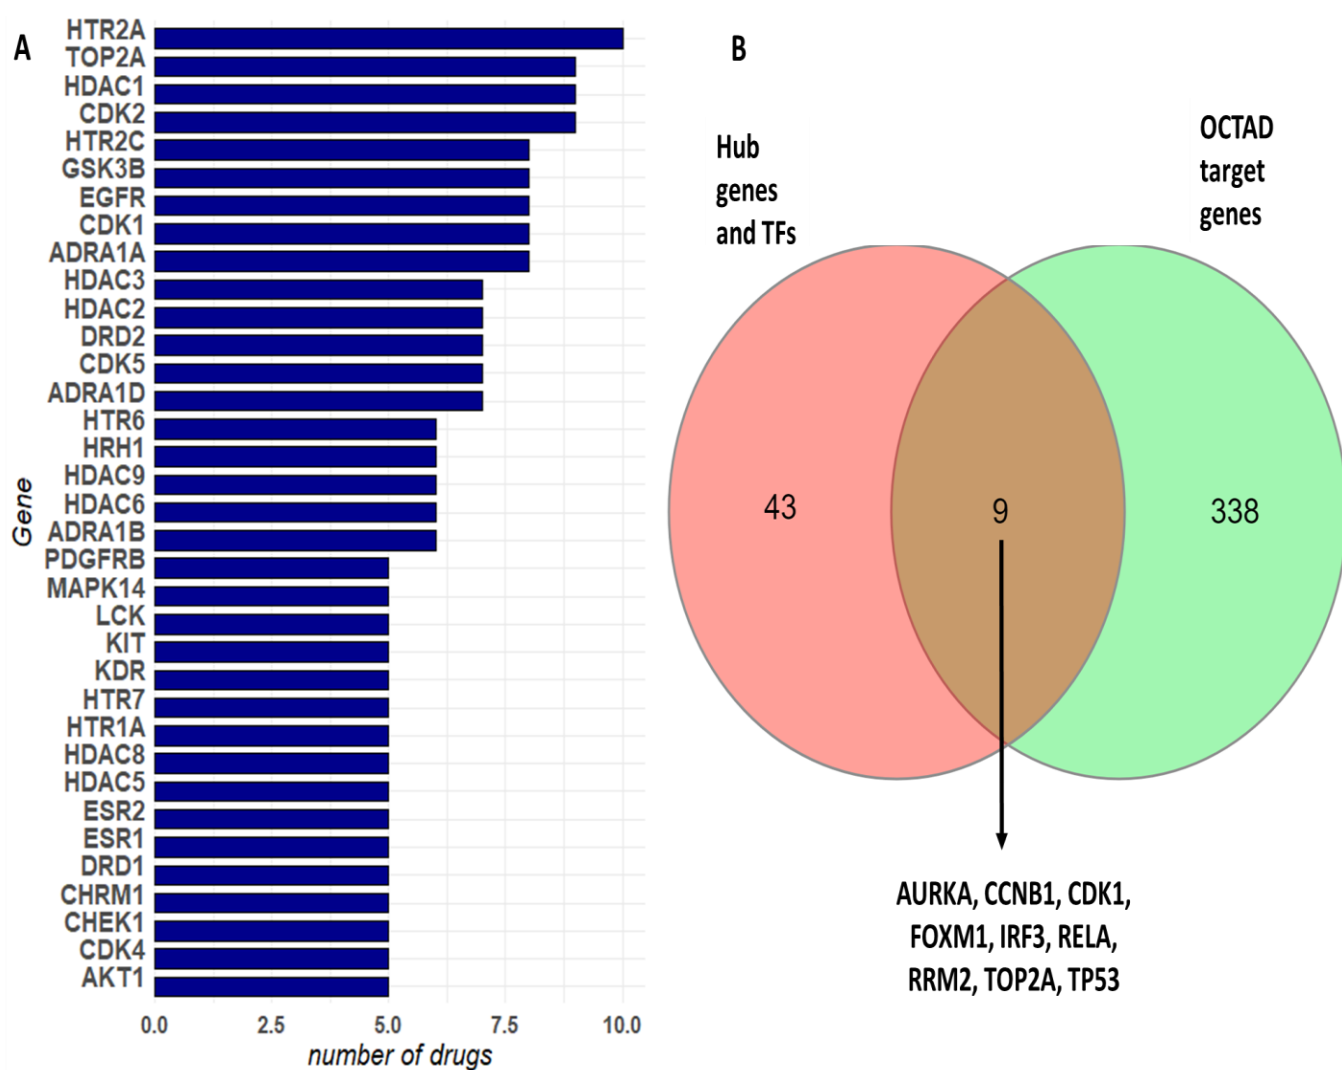

**Figure S6.** Target genes found in **A)** OCTAD database, and **B)** shared with our DEGs.

**Table S1.** Top genes ranked by distinct node centralities of the PPI network.

| Centrality |             |             |        |
|------------|-------------|-------------|--------|
| Degree     | Eigenvector | Betweenness | MCC    |
| CDK1       | CDK1        | HMMR        | CDK1   |
| ASPM       | ASPM        | CDK1        | ASPM   |
| DLGAP5     | DLGAP5      | ASPM        | DLGAP5 |
| PBK        | PBK         | CYP1A2      | PBK    |
| TOP2A      | TOP2A       | CENPF       | TOP2A  |
| NCAPG      | KIF20A      | CYP2E1      | CENPF  |
| CENPF      | NCAPG       | CYP26A1     | NCAPG  |
| KIF20A     | AURKA       | DLGAP5      | AURKA  |
| AURKA      | CCNB1       | PBK         | KIF20A |
| CCNB1      | CCNB2       | TOP2A       | PTTG1  |
| CCNB2      | CDC20       |             | BUB1B  |
| CDC20      | CENPF       |             | CCNB1  |
| PTTG1      | KIF4A       |             | CCNB2  |
| BUB1B      | NDC80       |             | CDC20  |
| KIF4A      | TTK         |             | KIF4A  |
| NDC80      | BUB1B       |             | NDC80  |
| TTK        | PTTG1       |             | TTK    |
|            | MELK        |             | MELK   |
|            | RRM2        |             | RRM2   |
|            | PRC1        |             | PRC1   |
|            | NEK2        |             | MELK   |

Table S2. Details about drugs that can potentially reverse the expression pattern of DEGs found in HCC.

| Drug                         | PubChem<br>CID | CAS number  | Synonyms*          | moa                                                                   |
|------------------------------|----------------|-------------|--------------------|-----------------------------------------------------------------------|
| Danusertib                   | 11442891       | 827318-97-8 | PHA-739358         | Aurora kinase inhibitor/<br>Growth factor receptor inhibitor          |
| Alvocidib                    | 5287969        | 146426-40-6 | Flavopiridol       | CDK inhibitor                                                         |
| Aminopurvalanol-A            | 6604931        | 220792-57-4 | -----              | CDK inhibitor /<br>Tyrosine kinase inhibitor                          |
| AT-7519                      | 11338033       | 844442-38-2 | -----              | CDK inhibitor                                                         |
| Quinoxaline1                 | 438981         | 56984-56-6  | CDK1-5-inhibitor   | CDK inhibitor /<br>Glycogen synthase kinase inhibitor                 |
| Indirubin                    | 10177          | 479-41-4    | Indigo Red         | CDK inhibitor /<br>Glycogen synthase kinase inhibitor                 |
| JNJ-7706621                  | 5330790        | 443797-96-4 | -----              | CDK inhibitor                                                         |
| Kenpaullone                  | 3820           | 142273-20-9 | NSC 664704         | CDK inhibitor /<br>Glycogen synthase kinase inhibitor                 |
| PHA-793887                   | 46191454       | 718630-59-2 | -----              | CDK inhibitor                                                         |
| Thiostrepton                 | 16129666       | 1393-48-2   | Bryamycin          | FOXO1 inhibitor<br>/ Protein synthesis inhibitor                      |
| Piceatannol                  | 667639         | 667639      | Hydroxyresveratrol | SYK inhibitor                                                         |
| Bortezomib                   | 387447         | 179324-69-7 | Velcade            | NFκB pathway inhibitor /<br>Proteasome inhibitor                      |
| caffeic-acid-phenethyl-ester | 5281787        | 115610-29-2 | Phenethyl caffeate | HIV integrase inhibitor                                               |
| pyrrolidine-dithiocarbamate  | 65351          | 25769-03-3  | PDTC               | NFκB pathway inhibitor                                                |
| Triptolide                   | 107985         | 38748-32-2  | PG490              | RNA polymerase inhibitor                                              |
| Cladribine                   | 20279          | 4291-63-8   | Leustatin          | Adenosine deaminase inhibitor<br>/ Ribonucleotide reductase inhibitor |



|                 |          |            |                                   |                                                            |
|-----------------|----------|------------|-----------------------------------|------------------------------------------------------------|
| Gemcitabine     | 60750    | 95058-81-4 | -----                             | Ribonucleotide<br>reductase<br>inhibitor                   |
| Amonafide       | 50515    | 69408-81-7 | Nafidimide                        | Topoisomerase<br>inhibitor                                 |
| Amsacrine       | 2179     | 51264-14-3 | mAMSA                             | Topoisomerase<br>inhibitor<br>RNA synthesis<br>inhibitor / |
| Daurunobicin    | 30323    | 20830-81-3 | -----                             | Topoisomerase<br>inhibitor                                 |
| Doxorubicin     | 31703    | 23214-92-8 | Adriamycin                        | Topoisomerase<br>inhibitor                                 |
| Idarubicin      | 42890    | 58957-92-9 | -----                             | Topoisomerase<br>inhibitor                                 |
| Mitoxantrone    | 4212     | 65271-80-9 | DHAQ                              | Topoisomerase<br>inhibitor                                 |
| Pirarubicin     | 11296583 | 72496-41-4 | THP-ADM                           | Topoisomerase<br>inhibitor<br>Microtubule<br>inhibitor /   |
| Podophyllotoxin | 10607    | 518-28-5   | Podofilox                         | Tubulin<br>polymerization<br>inhibitor                     |
| Teniposide      | 452548   | 29767-20-2 | VM-26                             | Topoisomerase<br>inhibitor                                 |
| Pifithrin-mu    | 327653   | 64984-31-2 | 2-<br>Phenylethynesulfon<br>amide | HSP inhibitor                                              |

---

Data retrieved from Pubchem (<https://pubchem.ncbi.nlm.nih.gov/>, accessed in September, 2023). CAS: Chemical Abstracts Service; moa: mechanism of action. \* the synonyms provided here are not the only ones available in the database.

[1] Liu, C. J., Hu, F. F., Xia, M. X., Han, L., Zhang, Q., and Guo, A. Y. (2018) GSCALite: a web server for gene set cancer analysis, *Bioinformatics* 34, 3771-3772.
